# Supplementary material for: Facile synthesis of hierarchically superstructured praseodymium benzenetricarboxylate with controllable morphologies
Source: Royal Society of Chemistry journal article supplement (doi:10.1039/c0ce00211a), 2010-09-06

## Supporting Information

### Hierarchically superstructured coordination polymer with tunable morphologies

Kai Liu, Yuhua Zheng, Guang Jia, Yeju Huang, Mei Yang, and Hongpeng You\*

*State Key Laboratory of Rare Earth Resource Utilization, Changchun Institute of Applied Chemistry, Chinese Academy of Sciences, Changchun 130022, and Graduate School of the Chinese Academy of Sciences, Beijing 100049, P. R. China, E-mail: hpyou@ciac.jl.cn*

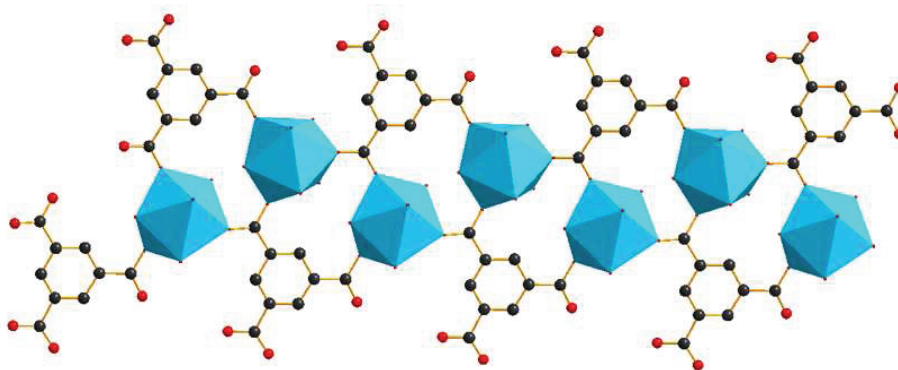

**Fig. S1** 1D ribbonlike structure along the a axis of the  $\text{Pr}(1,3,5\text{-BTC})(\text{H}_2\text{O})_6$ , the figures were drawn using the CIF file of  $\text{La}(1,3,5\text{-BTC})(\text{H}_2\text{O})_6$ . The hydrogen atoms were omitted for clarity. Pr blue (shown as polyhedra), O red, C gray.

Supplementary Material (ESI) for CrystEngComm  
This journal is © The Royal Society of Chemistry 2010

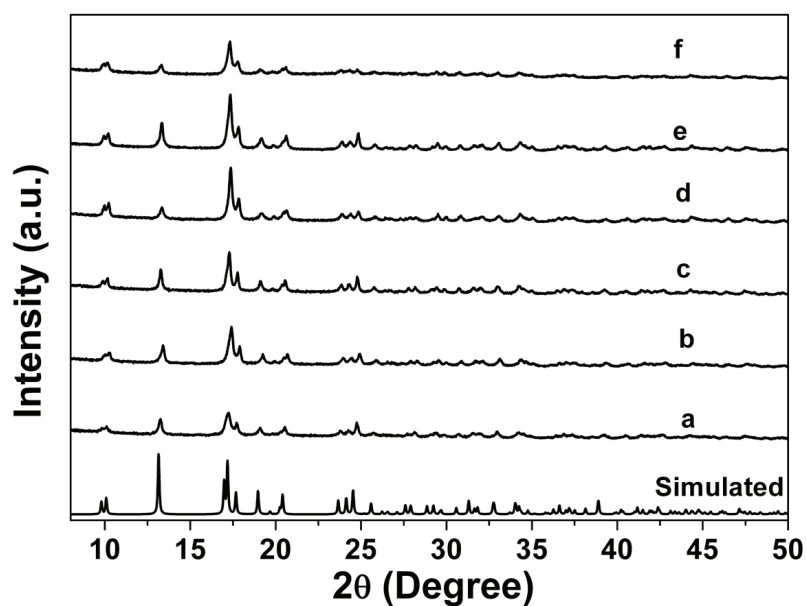

**Fig. S2** XRD patterns of the microbundles (a, 2.0g PVP, 0.5:0.5 mmol), broccoli (b, 0.5:0.5 mmol, static), embryo (c, 1:1 mmol, static) chrysanthemum-sheaf (d, 0.5:0.5 mmol, water/ethanol=3, 40 mL), dendrite-sheaf (e, 0.5:0.5 mmol, ethanol, 40 mL), and nanobundle (f, 0.05:0.05 mmol, ethanol, 40 mL), structures of the Pr(1,3,5-BTC)(H<sub>2</sub>O)<sub>6</sub> and simulated XRD pattern using the X-ray structure of La(1,3,5-BTC)(H<sub>2</sub>O)<sub>6</sub> single crystal.

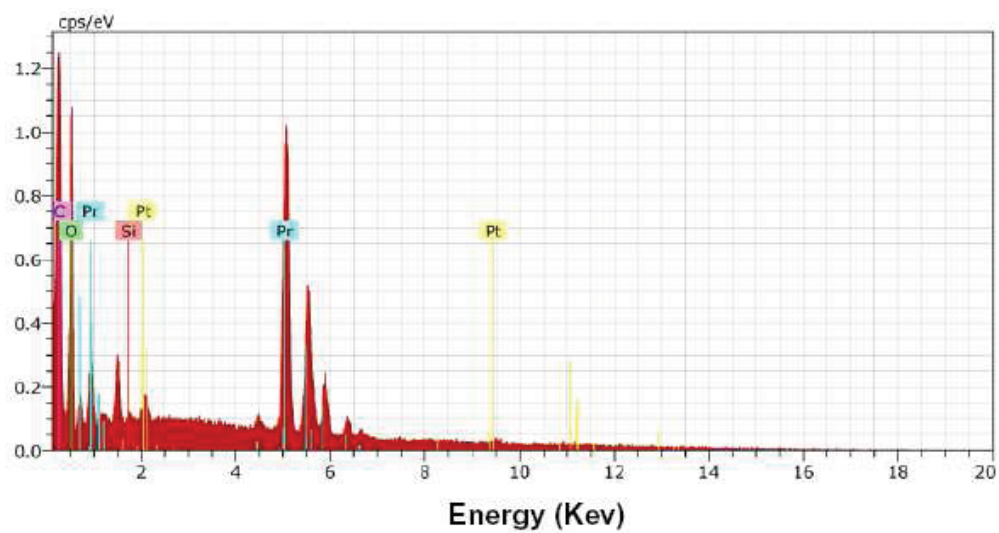

**Fig. S3** EDX spectrum of the  $\text{Pr}(1,3,5\text{-BTC})(\text{H}_2\text{O})_6$

Supplementary Material (ESI) for CrystEngComm  
This journal is © The Royal Society of Chemistry 2010

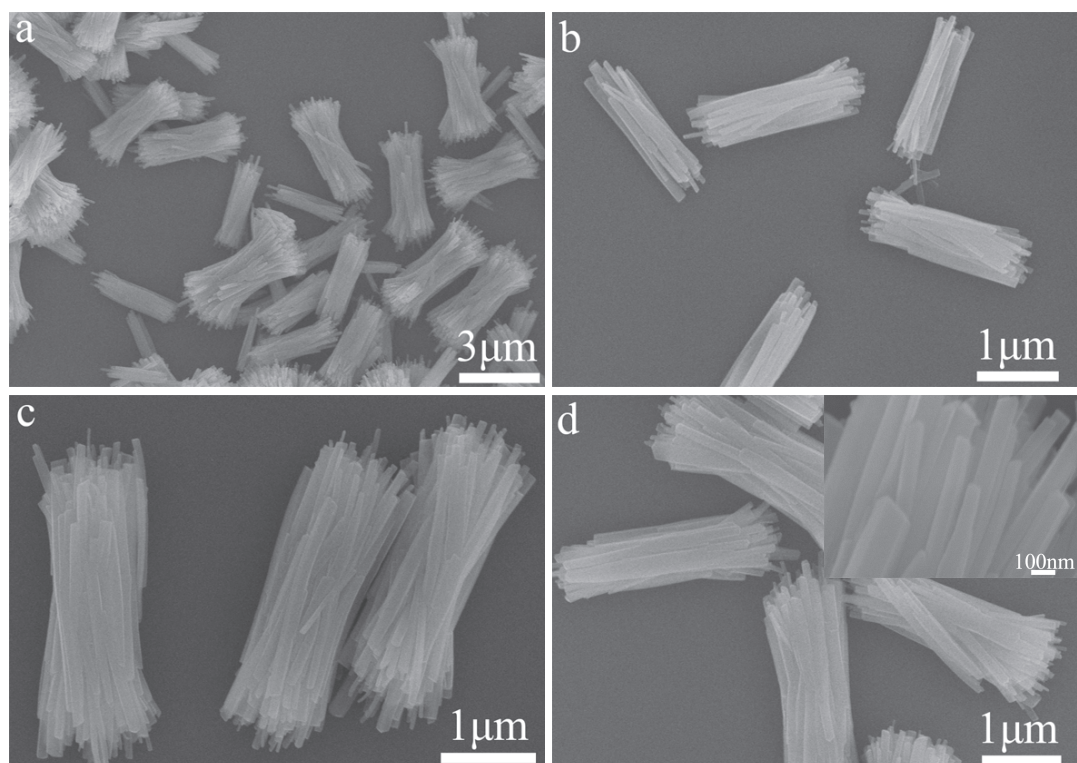

**Fig. S4** SEM images of the Pr(1,3,5-BTC)(H<sub>2</sub>O)<sub>6</sub> microbundles with the assistance of PVP (0.5:0.5 mmol, R.T., vigorous stirring, 2g PVP).

## Table of Contents Summary and Graphic

**Title:** Facile synthesis of hierarchically superstructured praseodymium benzenetricarboxylate with controllable Morphologies

**Authors:** Kai Liu, Yuhua Zheng, Guang Jia, Mei Yang, Yeju Huang, and Hongpeng You\*

Pr(1,3,5-BTC)(H<sub>2</sub>O)<sub>6</sub> with tunable morphologies including flower, straw-sheaf, chrysanthemum-sheaf, dendrite-sheaf, fan, bundle without fantails, broccoli, embryo superstructures, and nanorod were selectively prepared via direct precipitation in solution phase.

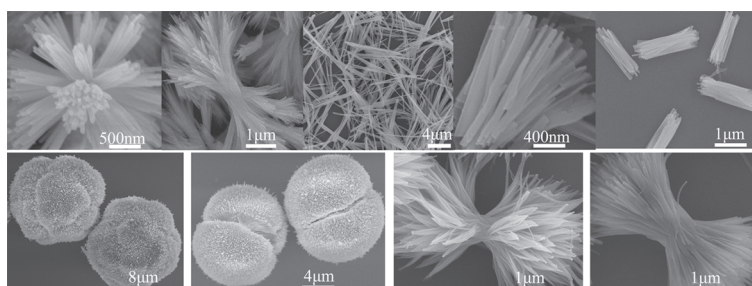

Supplement: c0ce00211a.pdf [file c0ce00211a.pdf]
